# Supplementary material for: Short-acquisition-time JPRESS and its application to paediatric brain tumours
Source: PubMed Central journal article supplement (PMC6424926; doi:10.1007/s10334-018-0716-6), 2018-11-20

# Alanine

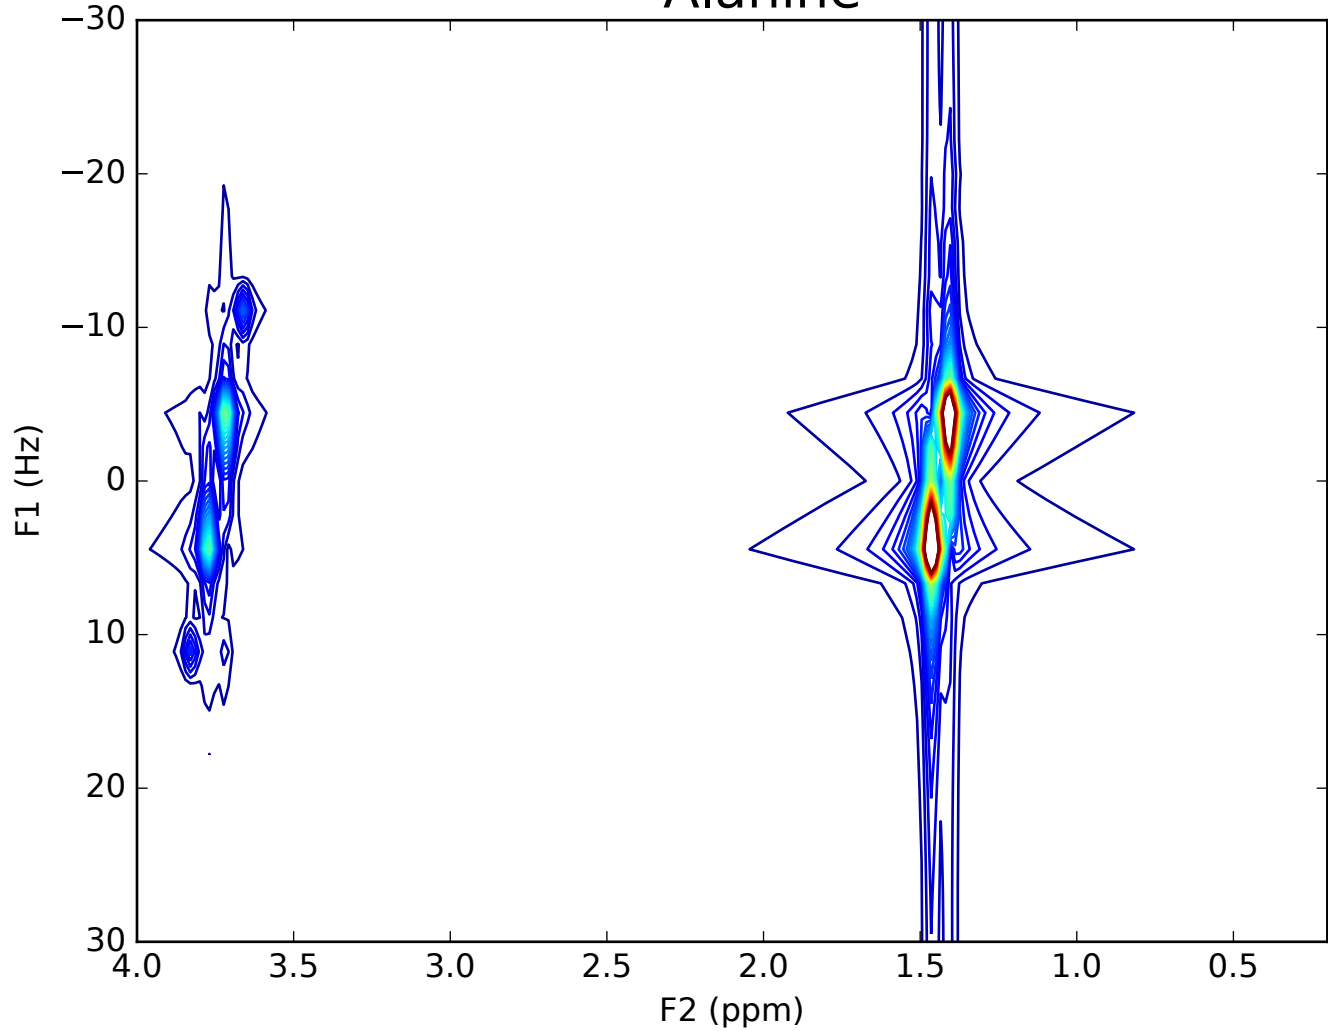

# Aspartate

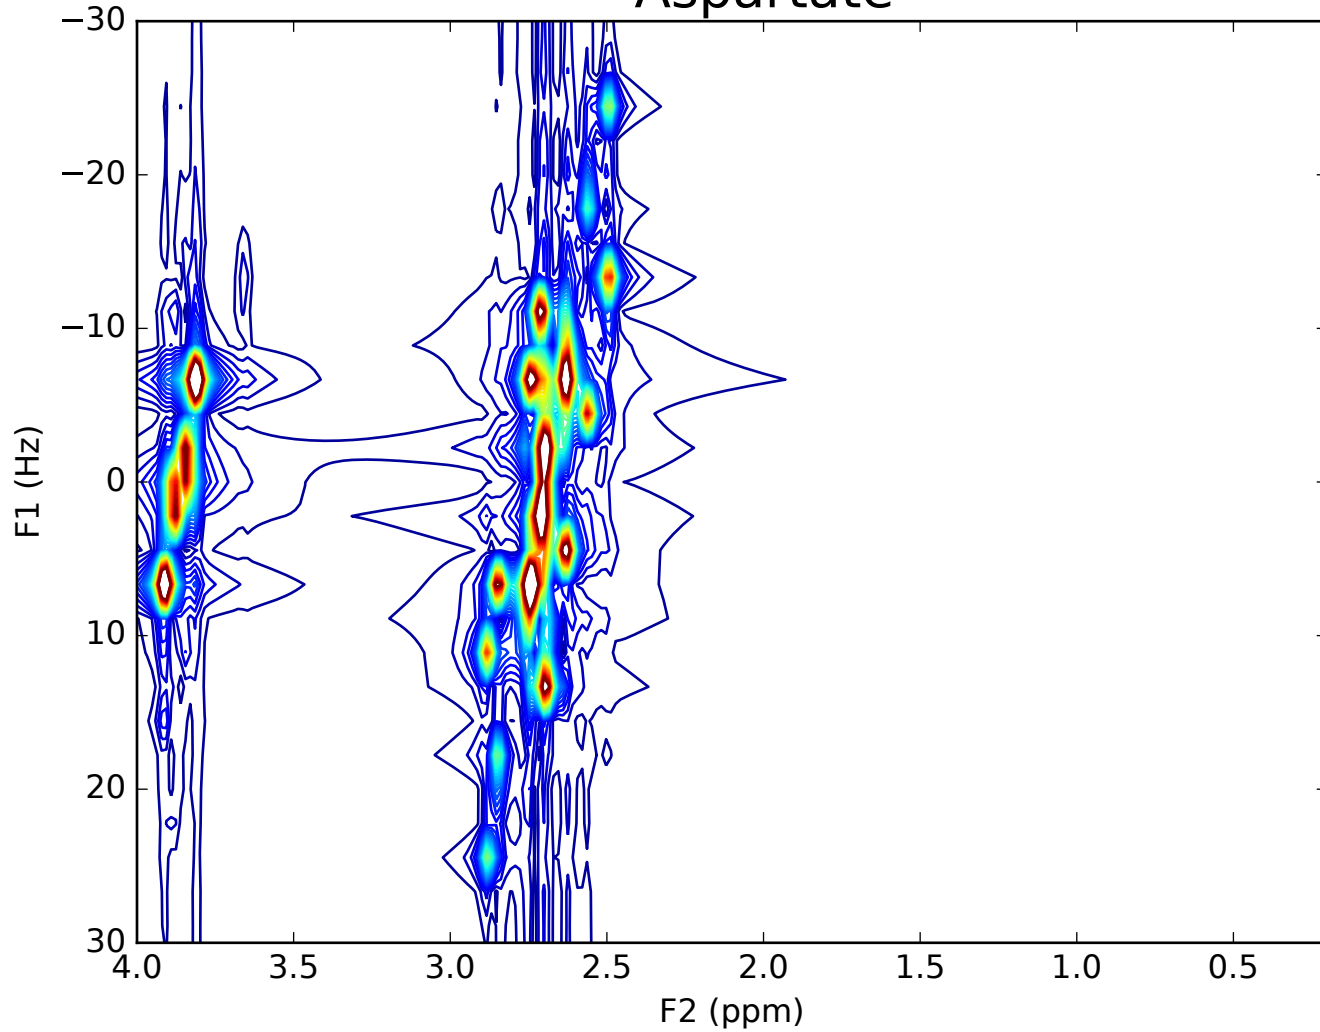

# Choline

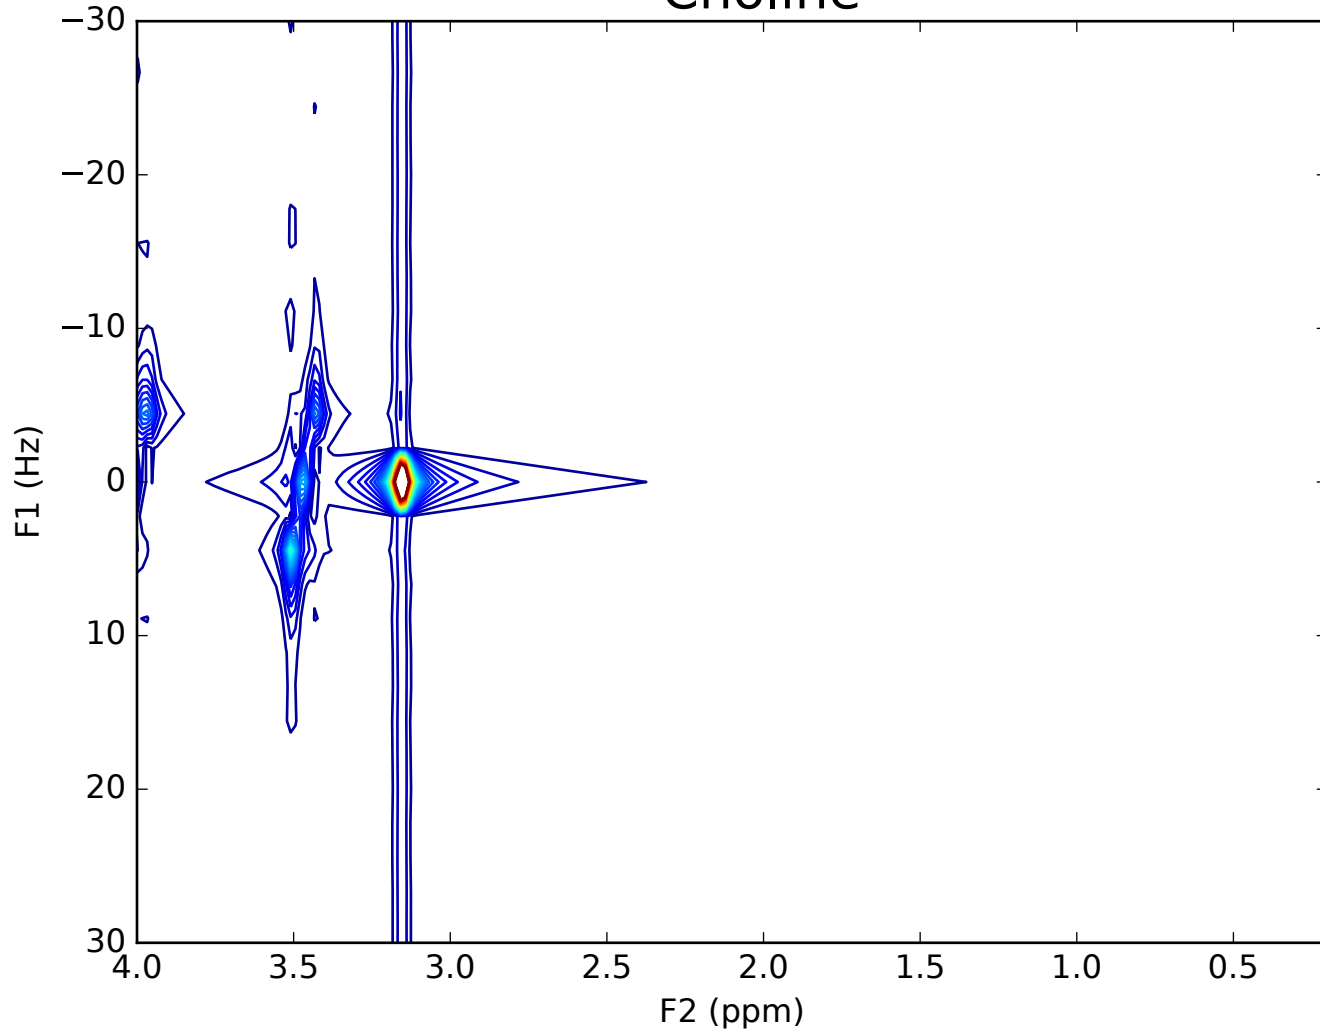

# Creatine

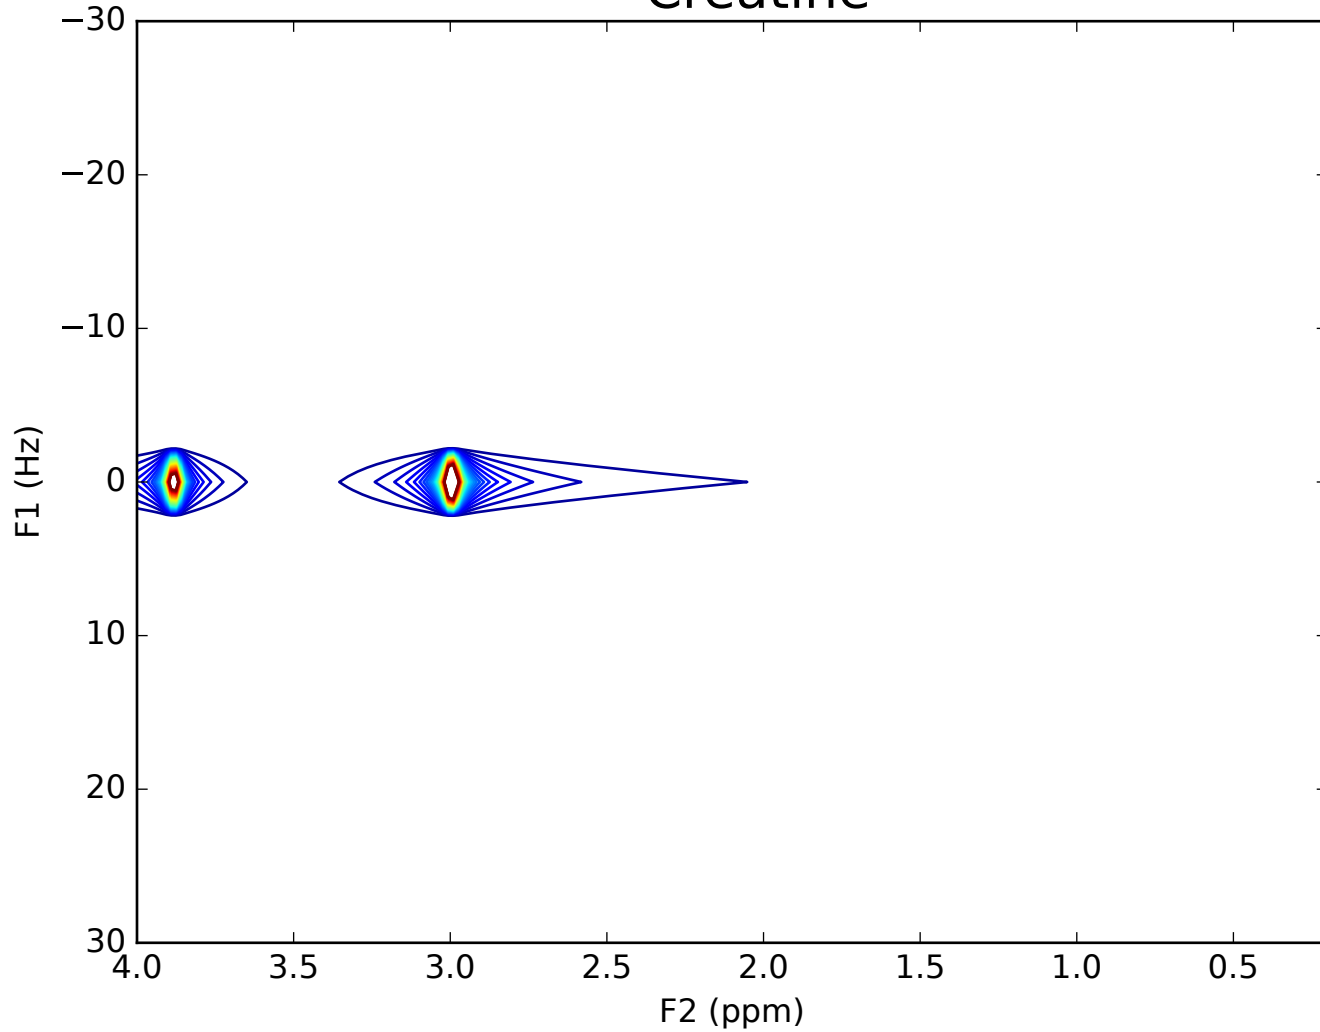

# GABA

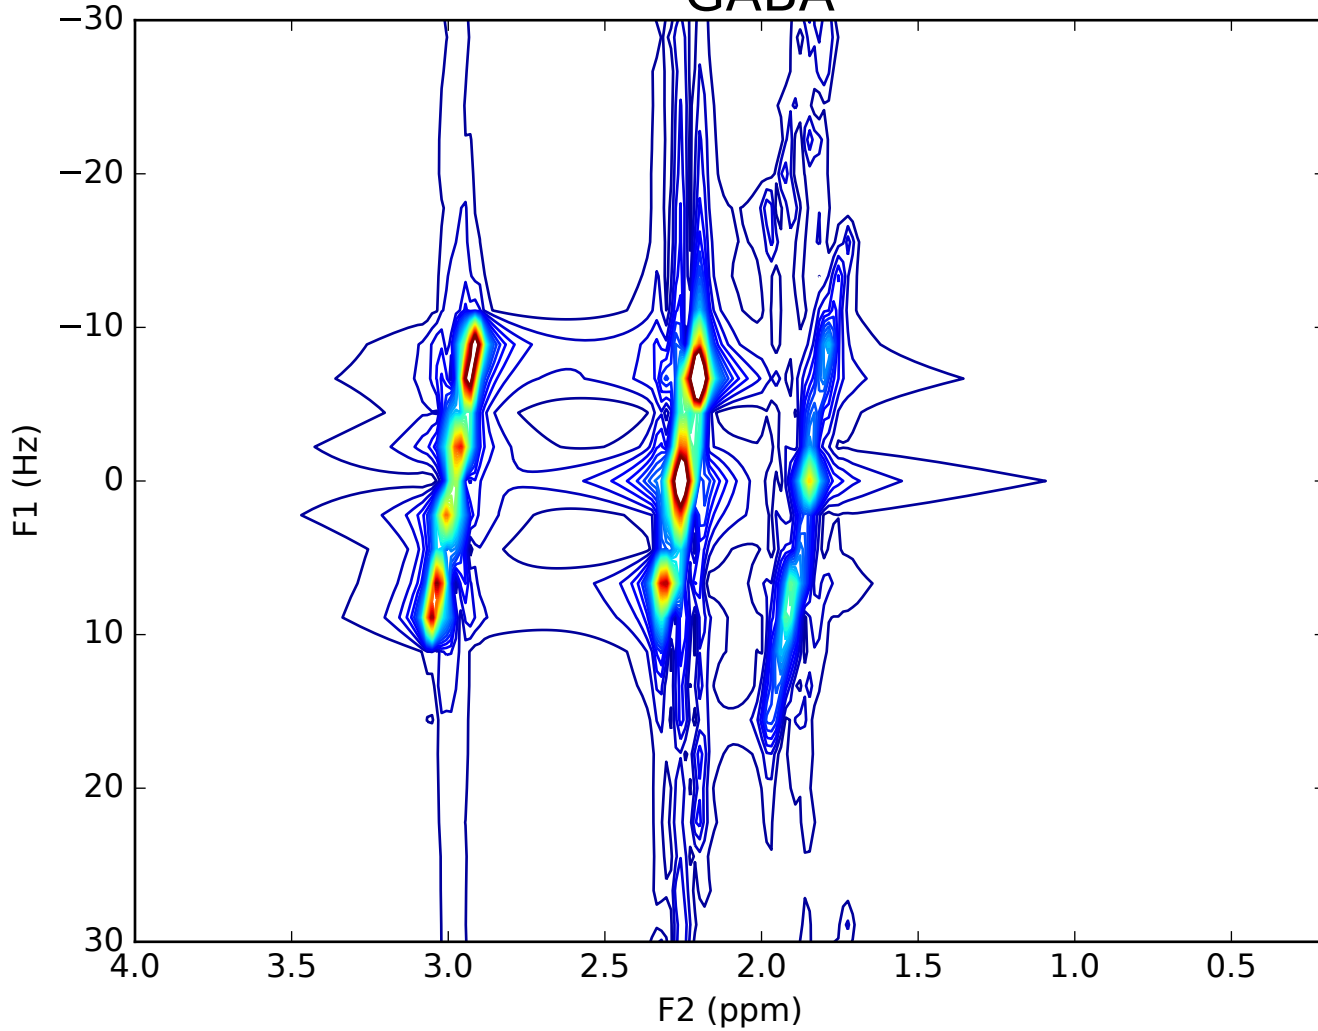

# Glucose-alpha

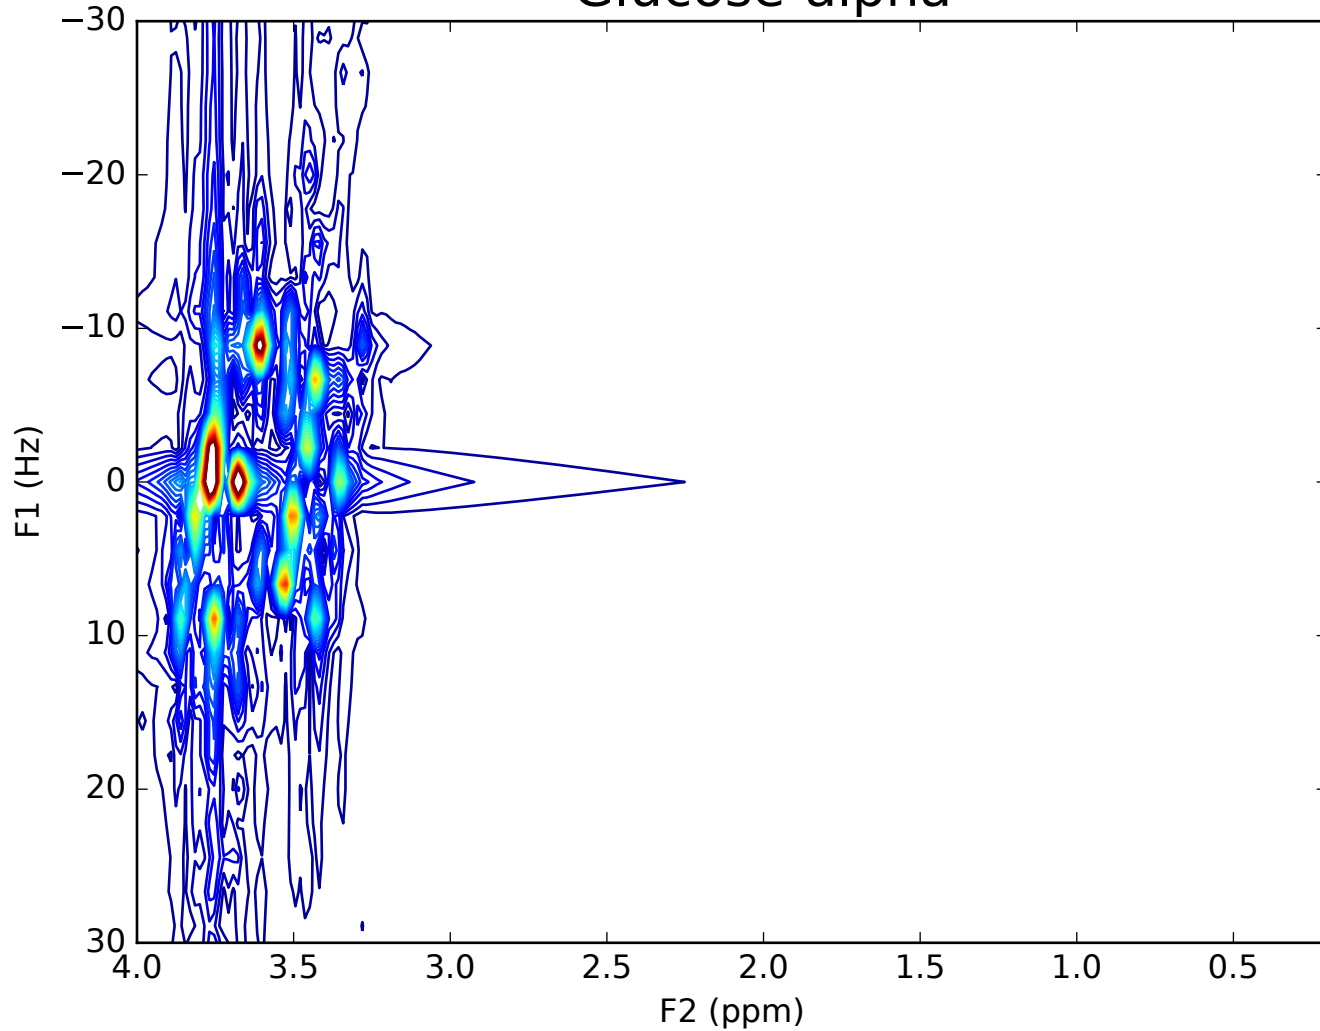

# Glucose-beta

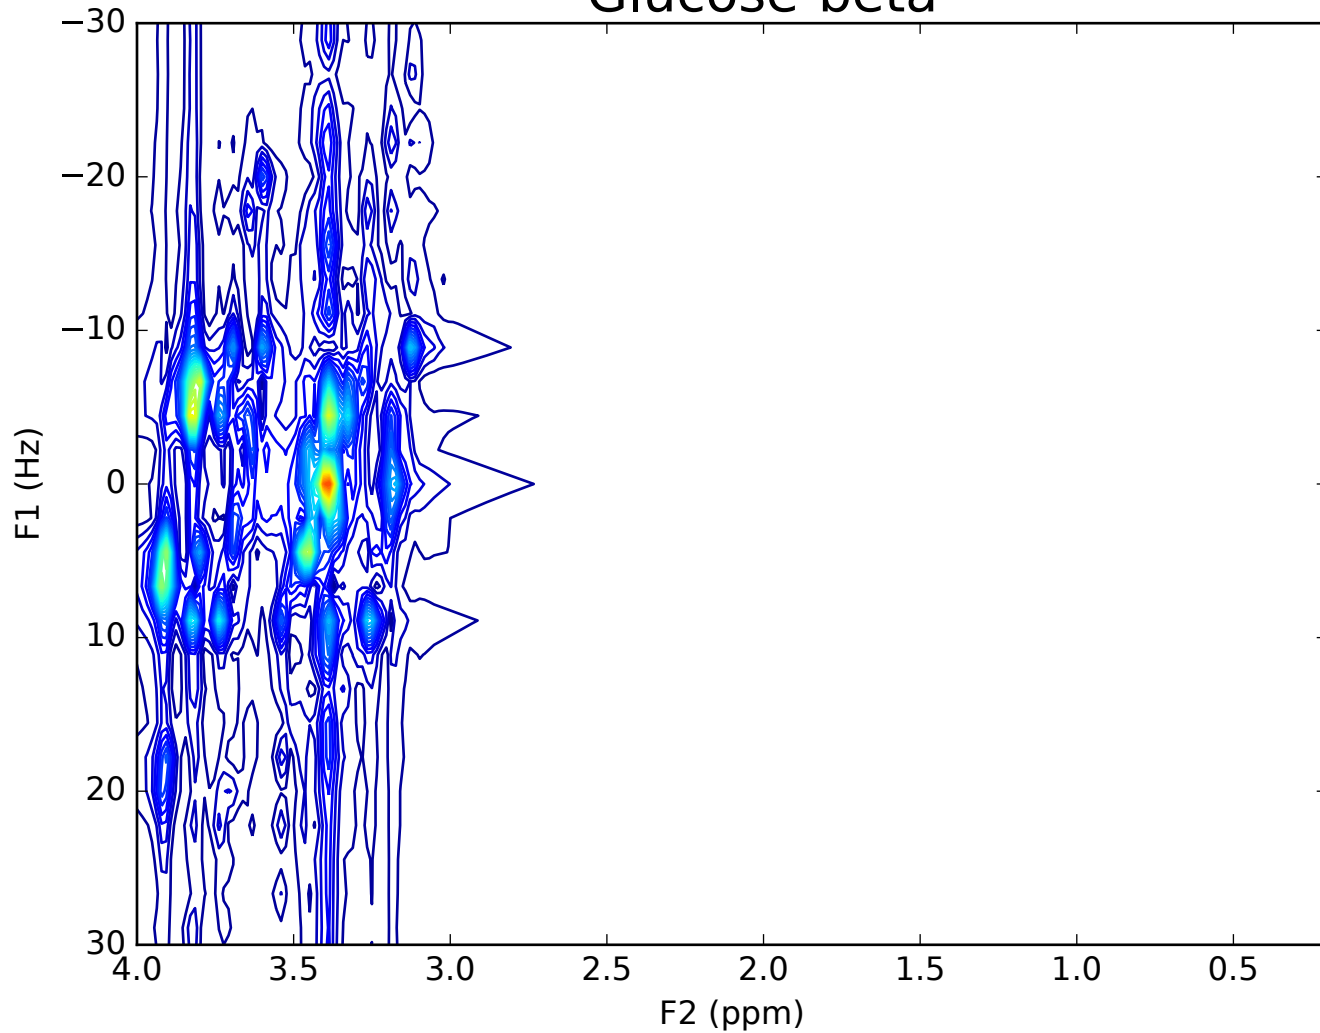

# Glutamate

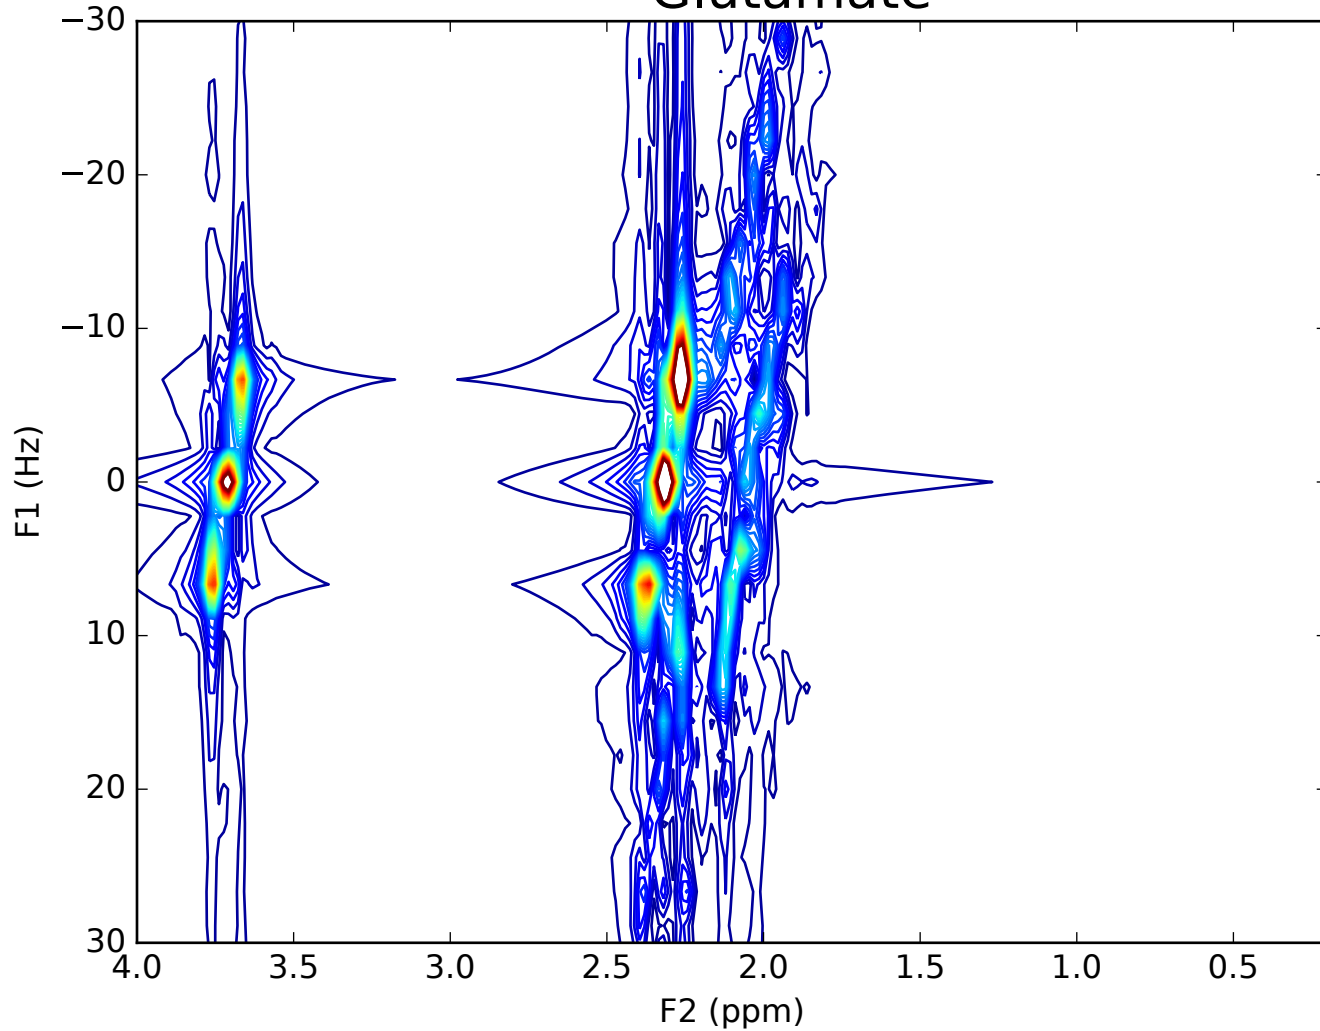



# Glutamine

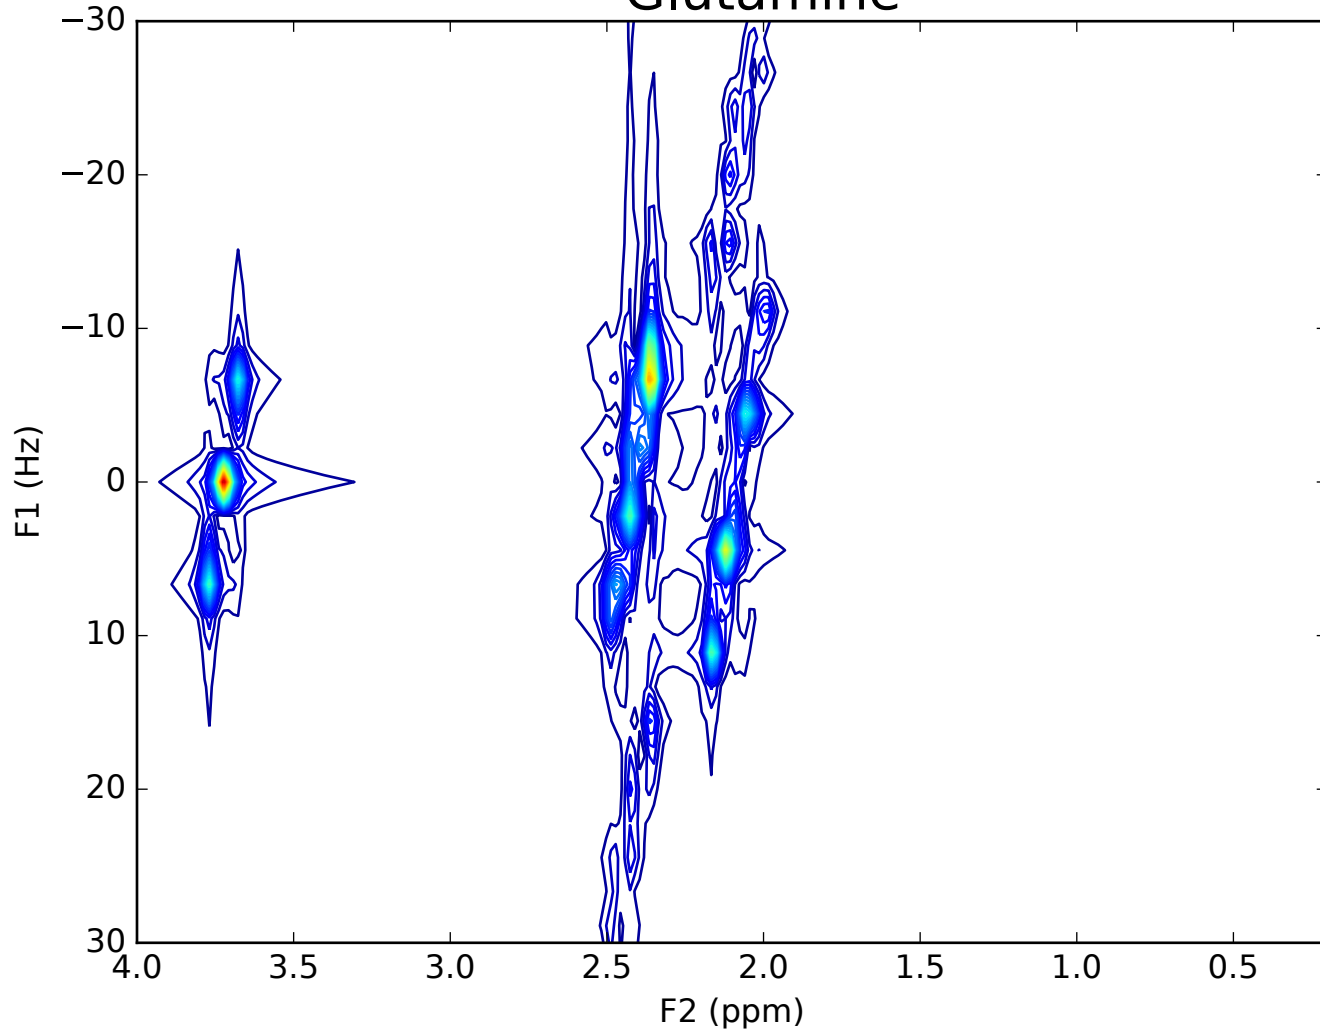

# Glutathione-glutamate

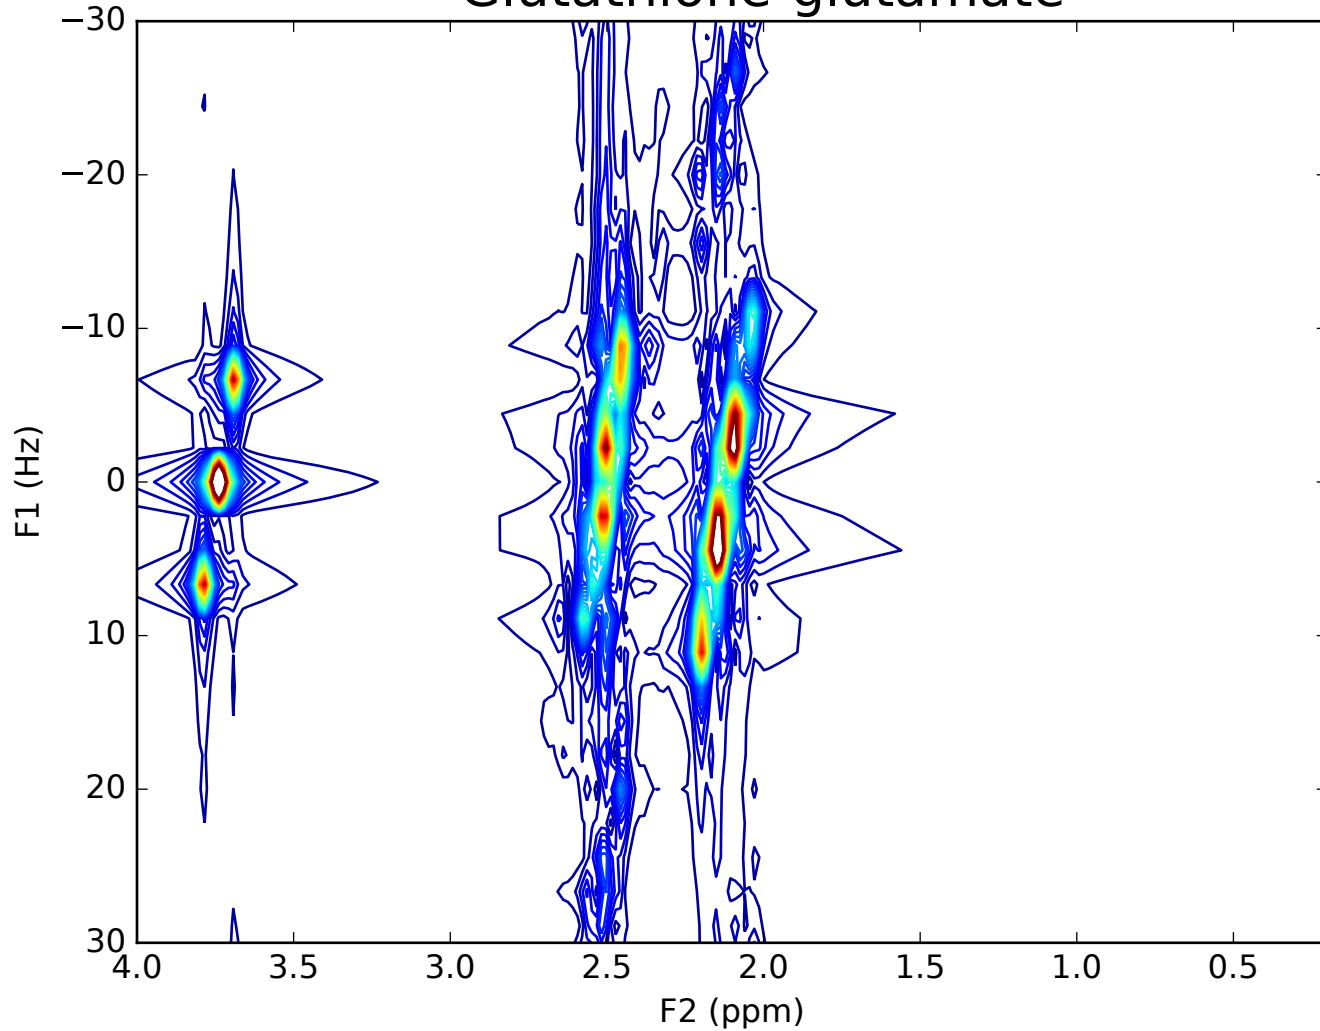

# Glutathione-glycine

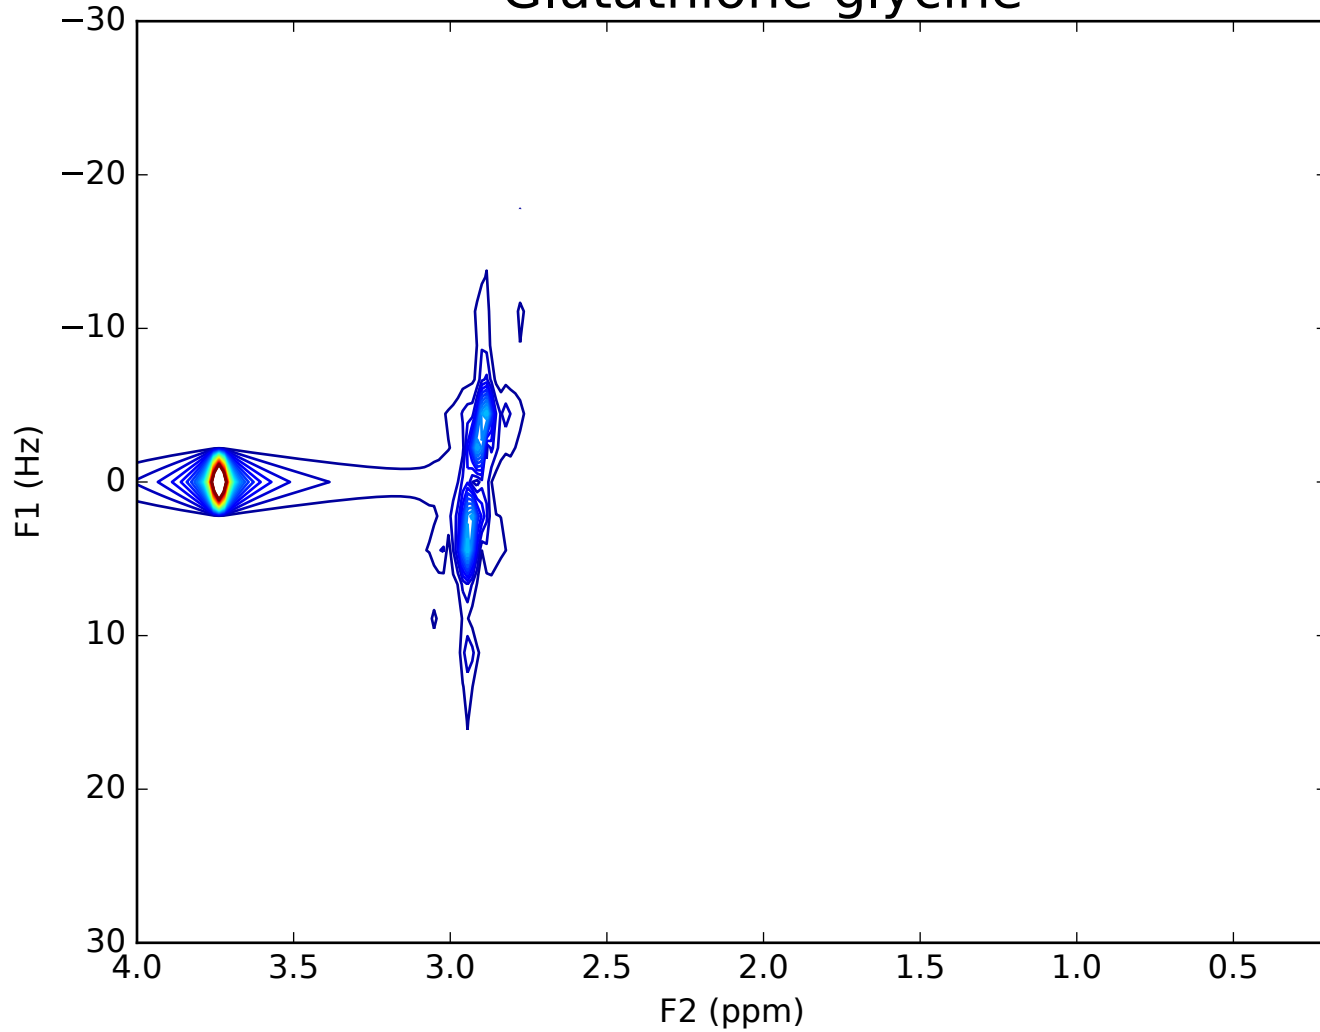

# Glycerophosphocholine

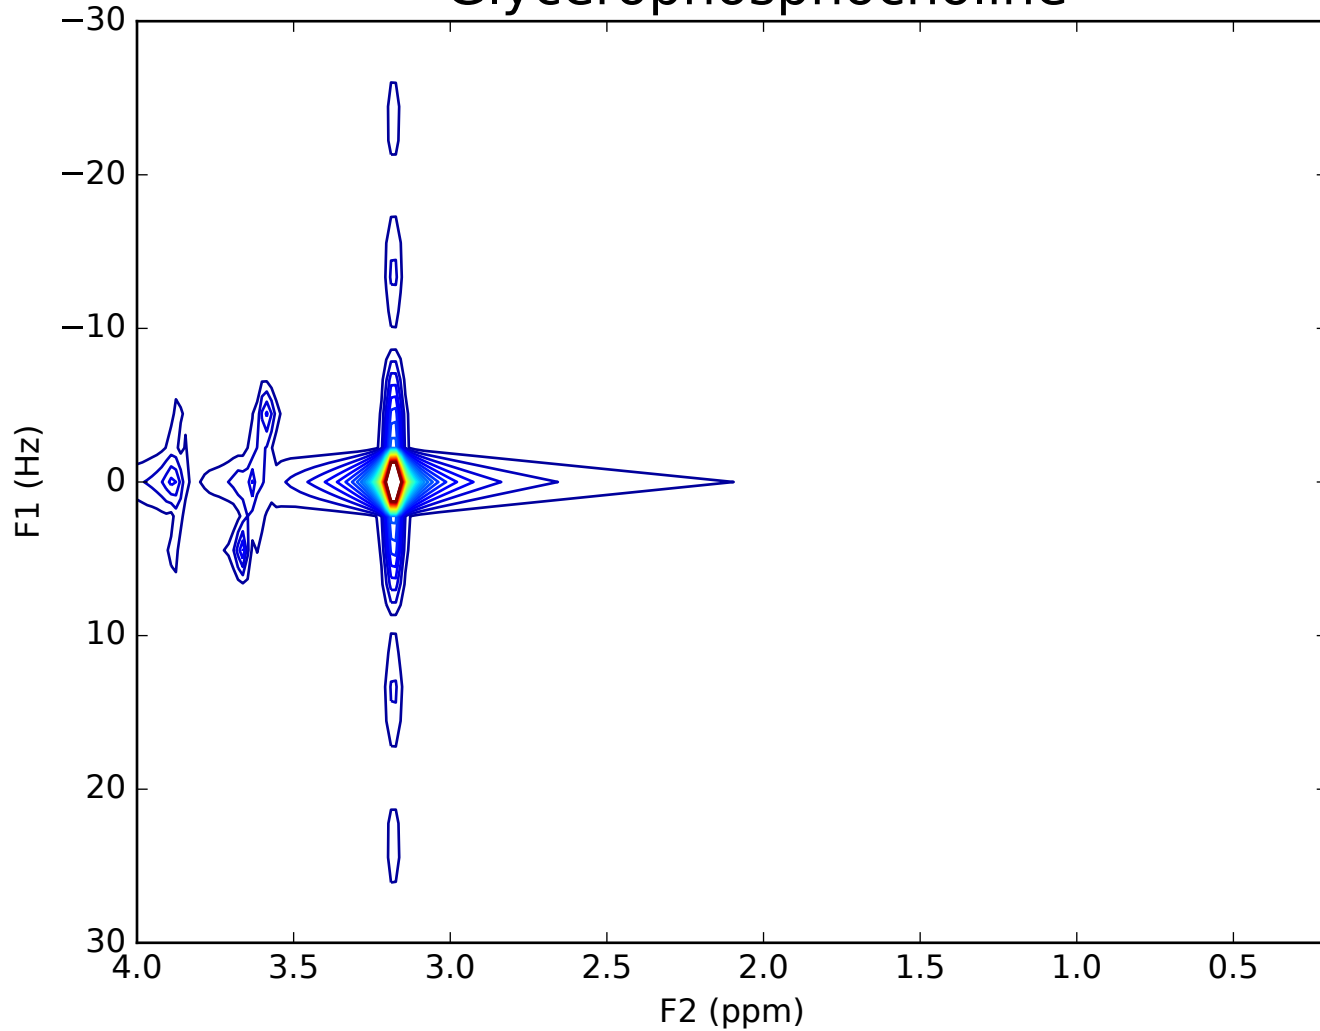

# Glycine

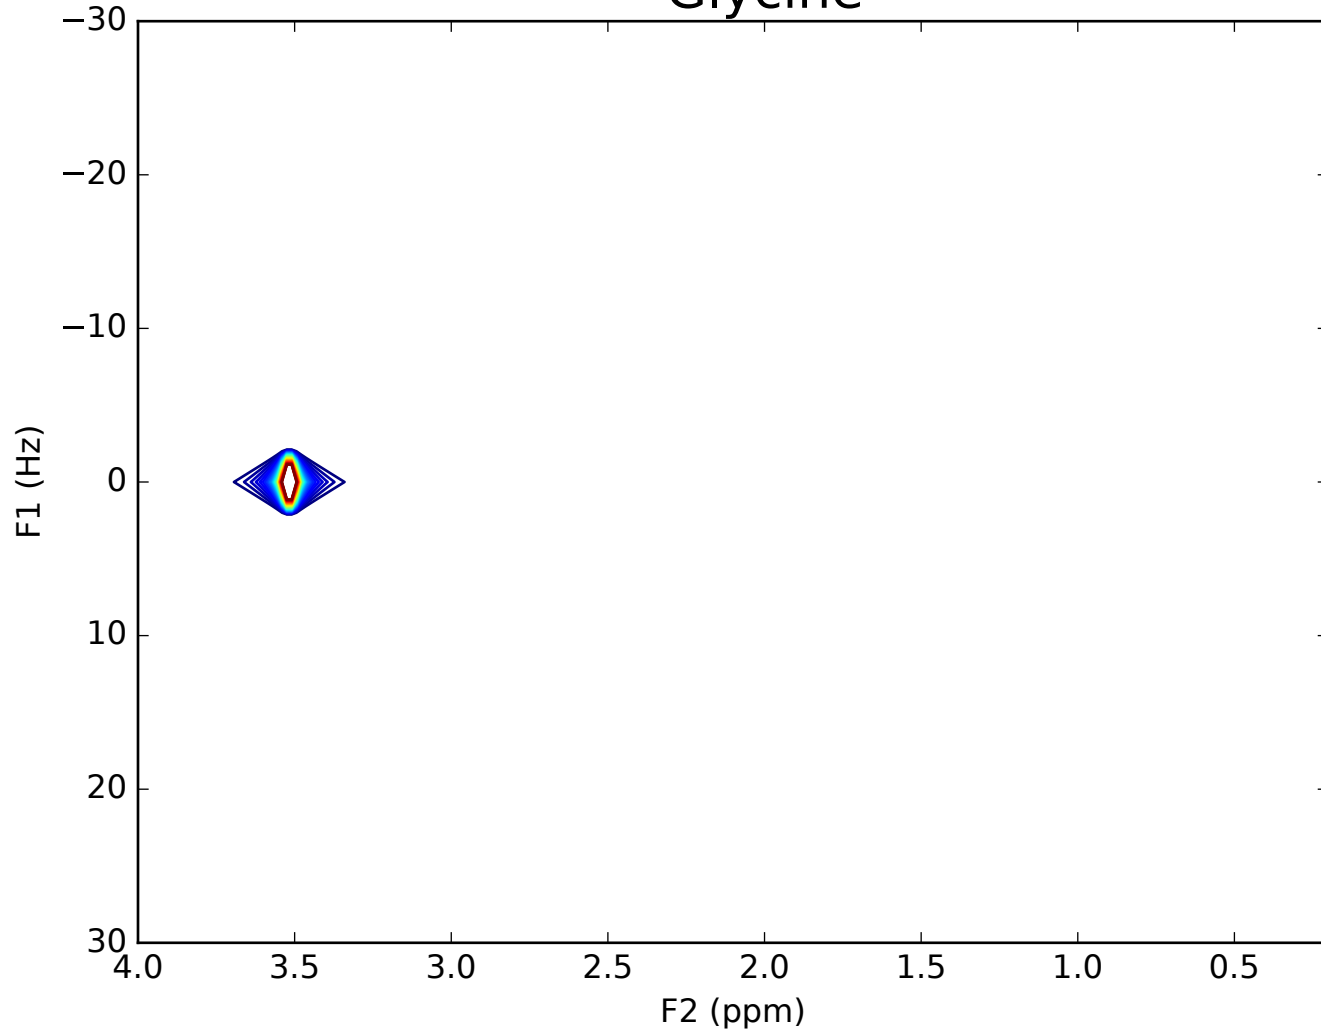

# Lactate

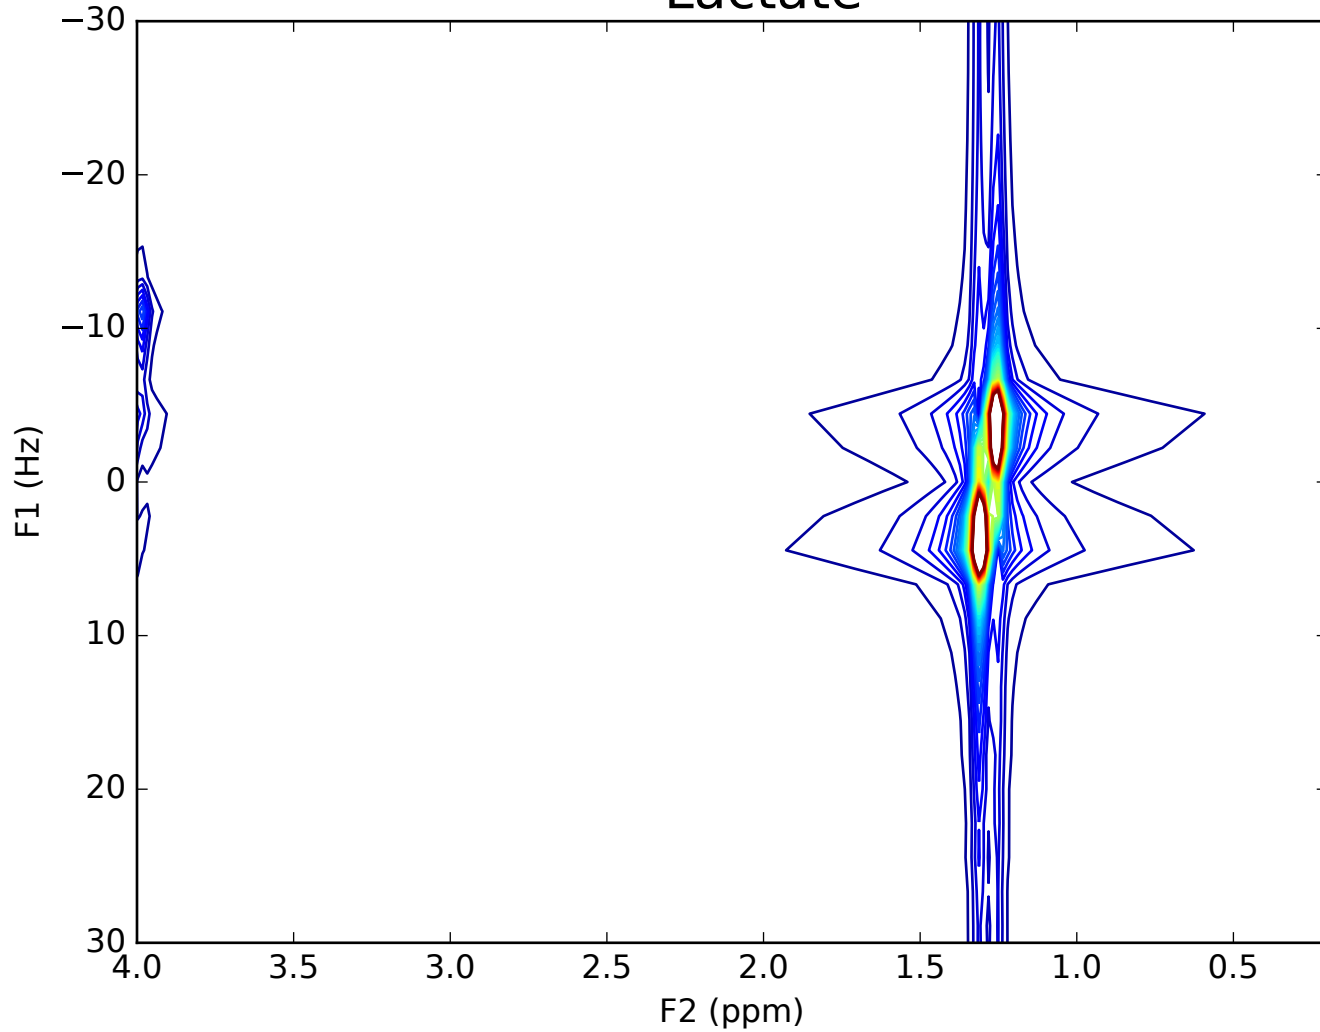

# myo-Inositol

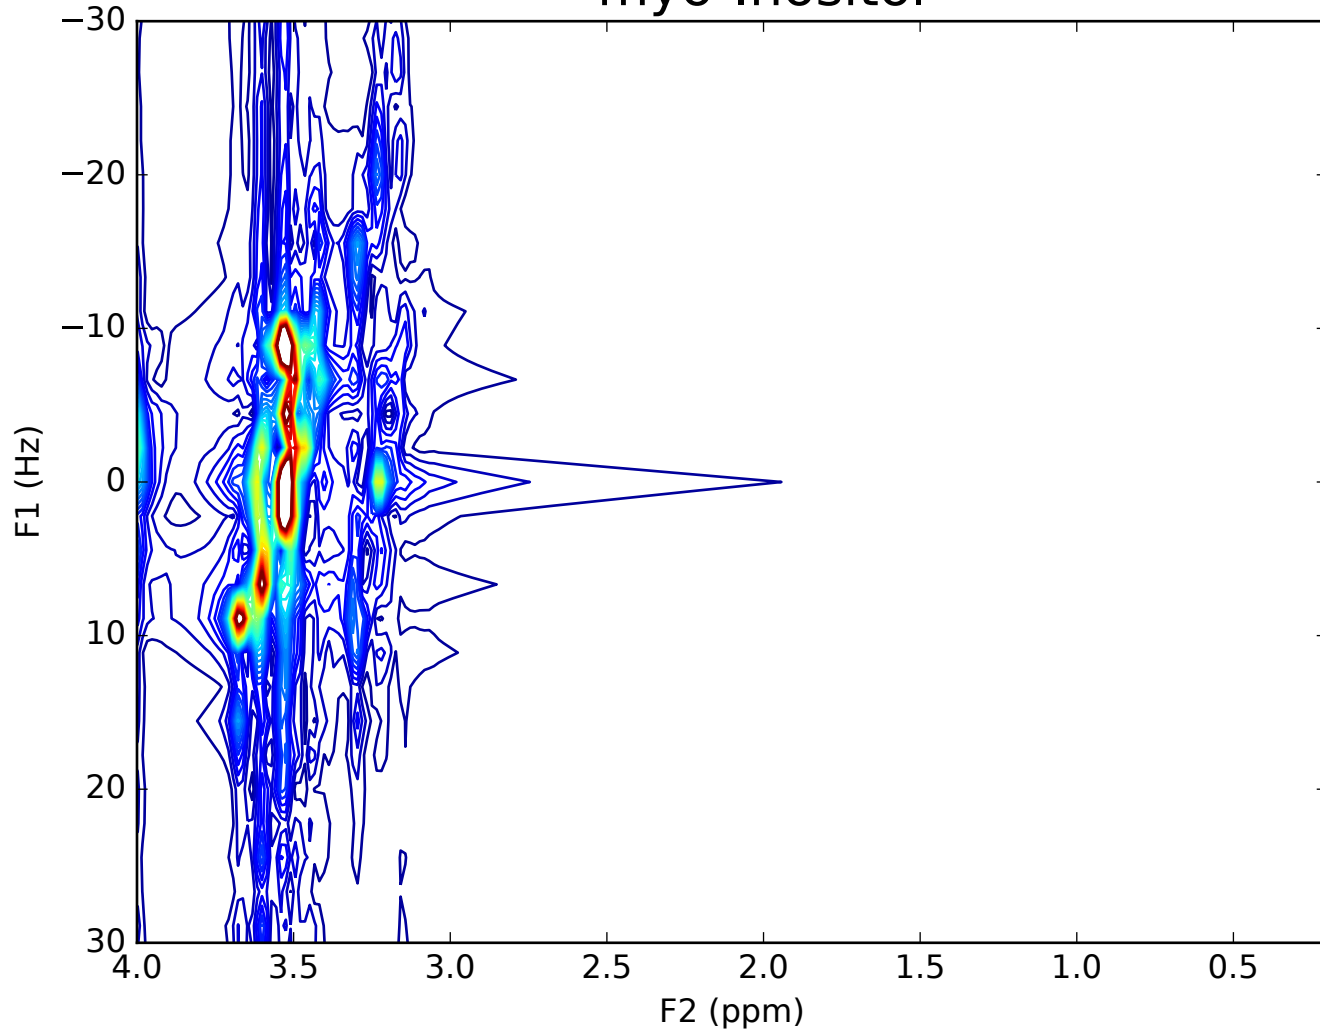

# NAA

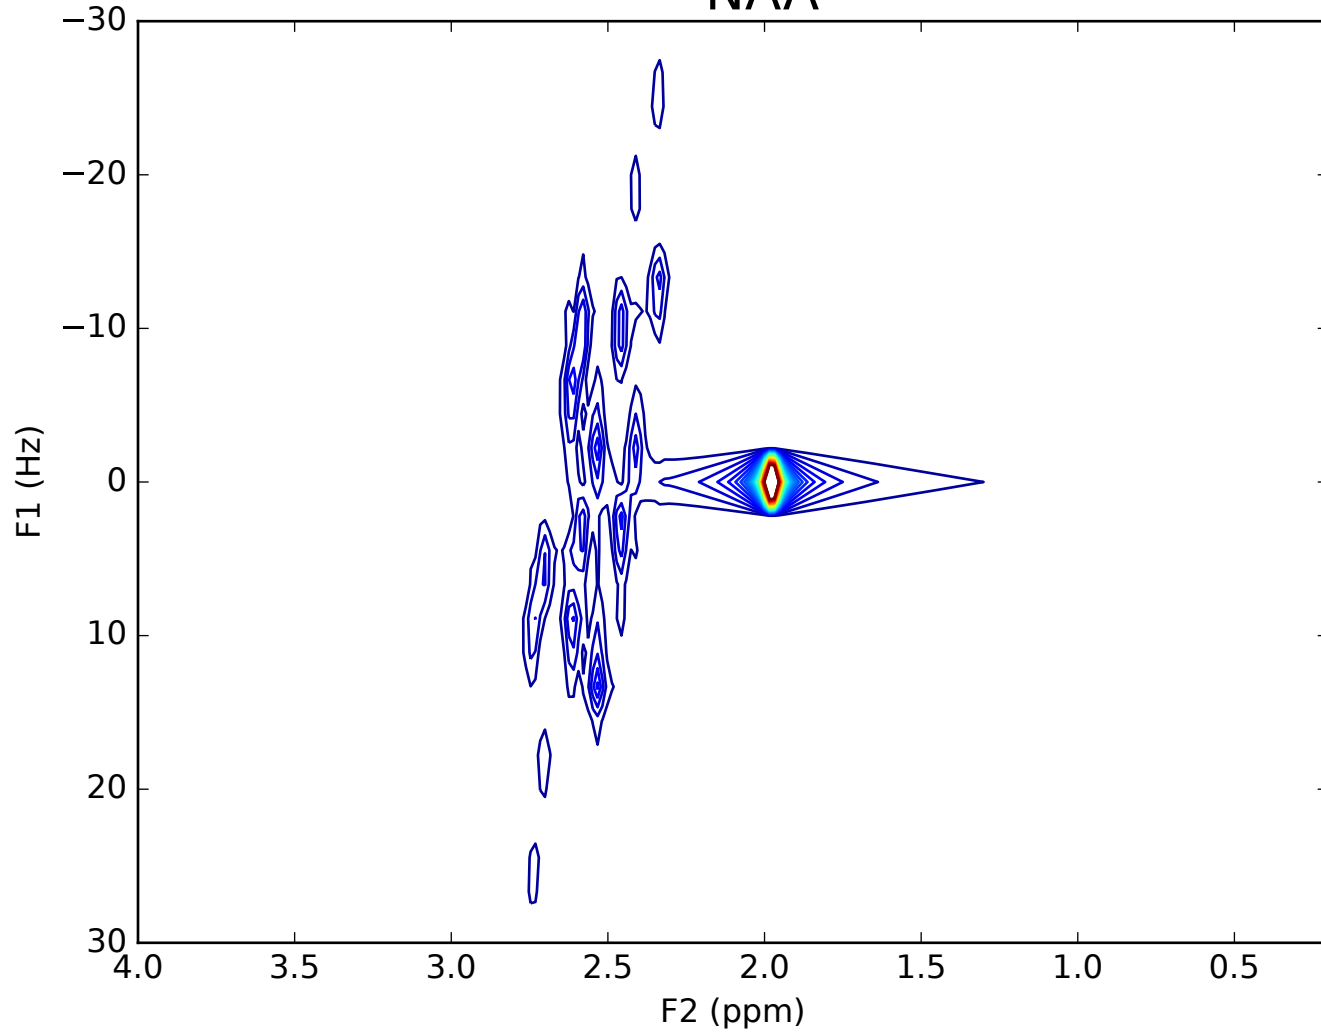



# NAAG

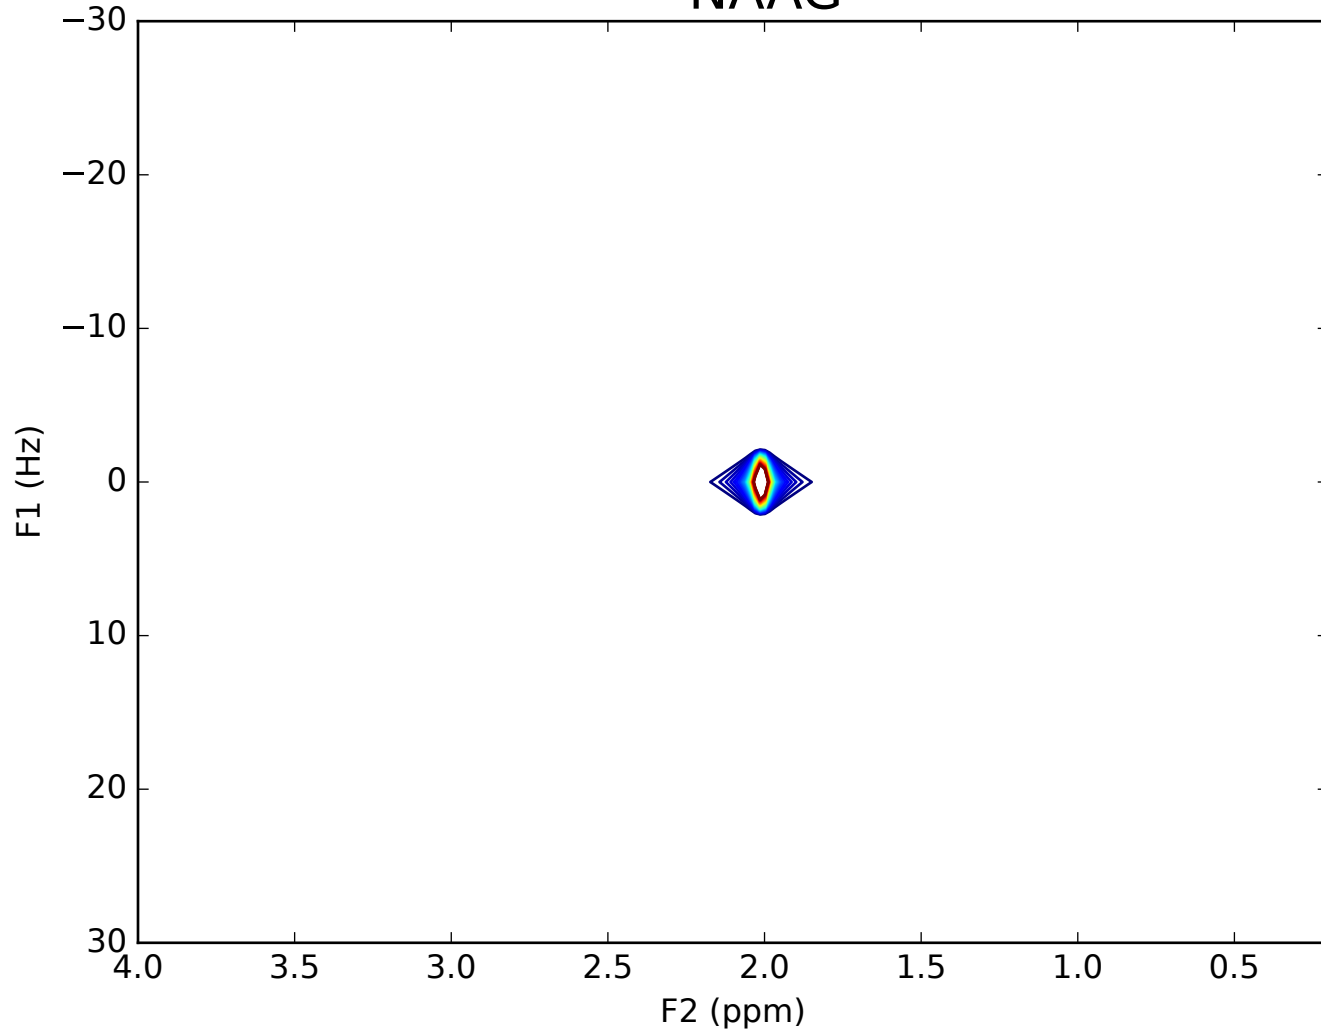

# Phosphocholine

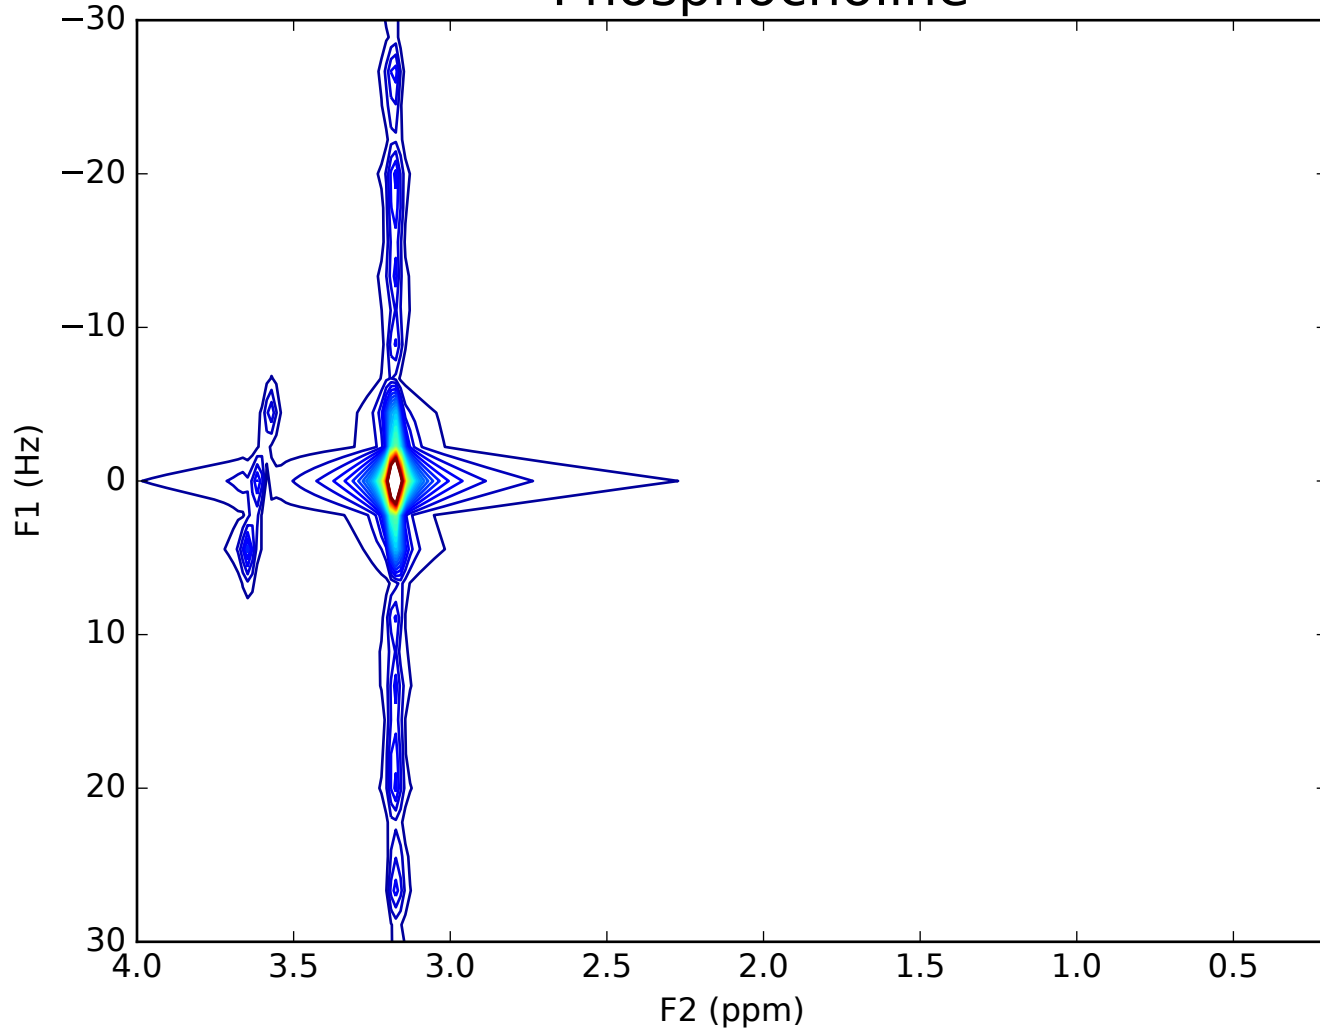

# scyllo-Inositol

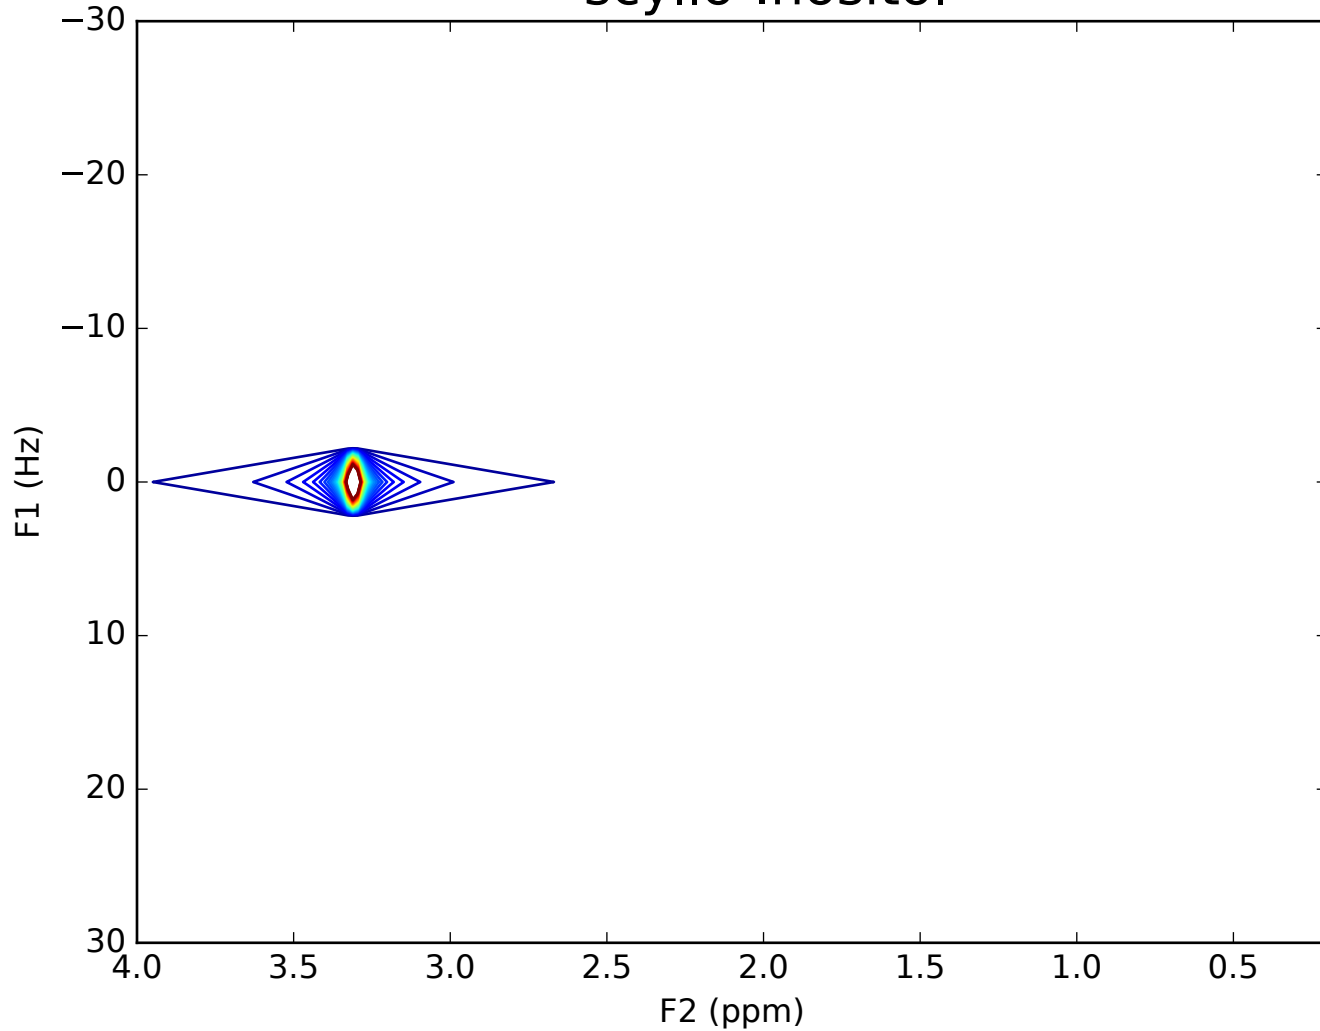

# Taurine

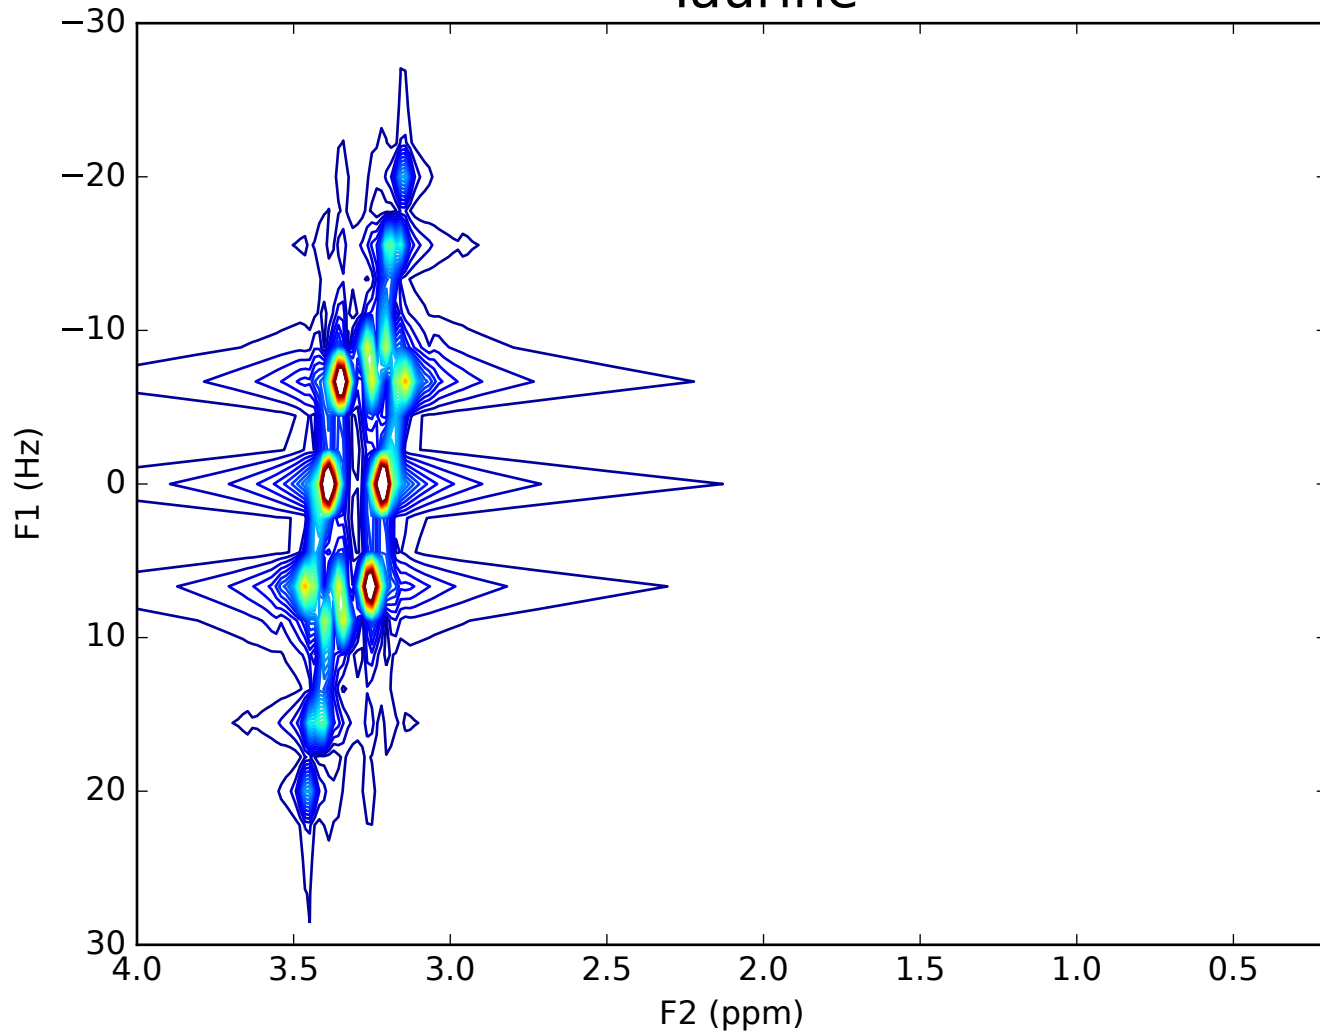

Supplement: 10334_2018_716_MOESM1_ESM.pdf [file 10334_2018_716_MOESM1_ESM.pdf]
